# Supplementary material for: A joint thermal and electromagnetic diagnostics approach for the inspection of thick walls
Source: Copernicus journal article supplement (doi:10.5194/gi-2016-32), 2016-11-01
Supplement: Supplementary file [file gi-2016-32-AC1-supplement.pdf]

**Reply to Editor**

Dear Prof. Eppelbaum,

Thank you for the very positive opinion about our manuscript.

We have corrected the inaccuracy about the reference you raised.

Best regards.
